# Supplementary material for: High-Quality Genome Assembly of Fusarium oxysporum f. sp. lini
Source: PubMed Central journal article supplement (PMC7481384; doi:10.3389/fgene.2020.00959), 2020-08-27
Supplement: Data_Sheet_2.pdf [file Data_Sheet_2.pdf]

**Supplementary Data 2.** The accuracy of contigs polished by Medaka (1 iteration) or Racon (2 iterations).

| <b>Assembler</b> | <b>ONT polisher</b> | <b>Contig accuracy</b> | <b>Substitution errors</b> | <b>Insertion/Deletion errors</b> |
|------------------|---------------------|------------------------|----------------------------|----------------------------------|
| Canu_contigs     | Medaka              | 99.9873                | 384                        | 8 626                            |
| Canu_contigs     | Racon_X2            | 99.9432                | 510                        | 39 770                           |
| Canu_unitigs     | Medaka              | 99.9876                | 541                        | 8 622                            |
| Canu_unitigs     | Racon_X2            | 99.9458                | 571                        | 39 351                           |
| Flye             | Medaka              | 99.9832                | 1 761                      | 9 857                            |
| Flye             | Racon_X2            | 99.9398                | 1 252                      | 40 330                           |
| Shasta           | Medaka              | 99.9726                | 1 422                      | 16 385                           |
| Shasta           | Racon_X2            | 99.9334                | 1 247                      | 42 021                           |
| wtdbg2           | Medaka              | 99.9765                | 1 783                      | 13 370                           |
| wtdbg2           | Racon_X2            | 99.9314                | 1 325                      | 42 767                           |

*Note:* The accuracy is evaluated by POLCA based on Illumina reads. ONT – Oxford Nanopore Technologies. Green – the best results, red – the worst results, yellow – average results.
