# Supplementary material for: High-Quality Genome Assembly of Fusarium oxysporum f. sp. lini
Source: PubMed Central journal article supplement (PMC7481384; doi:10.3389/fgene.2020.00959), 2020-08-27
Supplement: Data_Sheet_3.pdf [file Data_Sheet_3.pdf]

**Supplementary Data 3.** BUSCO results for various combinations of assemblers, Nanopore polishers, and/or Illumina polishers.

| <b>Assembler</b> | <b>Polisher<br/>(ONT reads)</b> | <b>Polisher<br/>(Illumina reads)</b> | <b>Rank</b> | <b>Complete, %</b> | <b>Complete</b> | <b>Frag-<br/>mented</b> | <b>Missing</b> | <b>Single-<br/>copy</b> | <b>Dupli-<br/>cated</b> |
|------------------|---------------------------------|--------------------------------------|-------------|--------------------|-----------------|-------------------------|----------------|-------------------------|-------------------------|
| Canu (contigs)   | Medaka                          | Pilon + POLCA                        | 25          | 99.46              | 3139            | 5                       | 12             | 3094                    | 45                      |
| Canu (unitigs)   | Medaka                          | Pilon + POLCA                        | 10          | 99.49              | 3140            | 5                       | 11             | 3095                    | 45                      |
| Flye             | Medaka                          | Pilon + POLCA                        | 25          | 99.46              | 3139            | 6                       | 11             | 3094                    | 45                      |
| Shasta           | Medaka                          | Pilon + POLCA                        | 10          | 99.49              | 3140            | 5                       | 11             | 3091                    | 49                      |
| wtdbg2           | Medaka                          | Pilon + POLCA                        | 25          | 99.46              | 3139            | 5                       | 12             | 3096                    | 43                      |
| Canu (contigs)   | Medaka                          | Pilon-bt2                            | 25          | 99.46              | 3139            | 5                       | 12             | 3094                    | 45                      |
| Canu (unitigs)   | Medaka                          | Pilon-bt2                            | 25          | 99.46              | 3139            | 5                       | 12             | 3094                    | 45                      |
| Flye             | Medaka                          | Pilon-bt2                            | 10          | 99.49              | 3140            | 6                       | 10             | 3095                    | 45                      |
| Shasta           | Medaka                          | Pilon-bt2                            | 39          | 99.43              | 3138            | 6                       | 12             | 3089                    | 49                      |
| wtdbg2           | Medaka                          | Pilon-bt2                            | 39          | 99.43              | 3138            | 5                       | 13             | 3095                    | 43                      |
| Canu (contigs)   | Medaka                          | Pilon-BWA                            | 39          | 99.43              | 3138            | 6                       | 12             | 3093                    | 45                      |
| Canu (unitigs)   | Medaka                          | Pilon-BWA                            | 39          | 99.43              | 3138            | 6                       | 12             | 3093                    | 45                      |
| Flye             | Medaka                          | Pilon-BWA                            | 39          | 99.43              | 3138            | 7                       | 11             | 3093                    | 45                      |
| Shasta           | Medaka                          | Pilon-BWA                            | 46          | 99.40              | 3137            | 7                       | 12             | 3088                    | 49                      |
| wtdbg2           | Medaka                          | Pilon-BWA                            | 39          | 99.43              | 3138            | 5                       | 13             | 3095                    | 43                      |
| Canu (contigs)   | Medaka                          | POLCA                                | 10          | 99.49              | 3140            | 5                       | 11             | 3095                    | 45                      |
| Canu (unitigs)   | Medaka                          | POLCA                                | 10          | 99.49              | 3140            | 5                       | 11             | 3095                    | 45                      |
| Flye             | Medaka                          | POLCA                                | 4           | 99.52              | 3141            | 6                       | 9              | 3096                    | 45                      |
| Shasta           | Medaka                          | POLCA                                | 10          | 99.49              | 3140            | 5                       | 11             | 3091                    | 49                      |
| wtdbg2           | Medaka                          | POLCA                                | 25          | 99.46              | 3139            | 5                       | 12             | 3096                    | 43                      |
| Canu (contigs)   | Medaka                          | POLCA X2                             | 25          | 99.46              | 3139            | 5                       | 12             | 3094                    | 45                      |
| Canu (unitigs)   | Medaka                          | POLCA X2                             | 25          | 99.46              | 3139            | 5                       | 12             | 3094                    | 45                      |

|                |          |               |           |              |      |     |    |      |    |
|----------------|----------|---------------|-----------|--------------|------|-----|----|------|----|
| Flye           | Medaka   | POLCA X2      | <b>4</b>  | <b>99.52</b> | 3141 | 6   | 9  | 3096 | 45 |
| Shasta         | Medaka   | POLCA X2      | <b>10</b> | <b>99.49</b> | 3140 | 5   | 11 | 3091 | 49 |
| wtdbg2         | Medaka   | POLCA X2      | <b>25</b> | <b>99.46</b> | 3139 | 5   | 12 | 3096 | 43 |
| Canu (contigs) | Medaka   |               | <b>62</b> | <b>98.67</b> | 3114 | 18  | 24 | 3069 | 45 |
| Canu (unitigs) | Medaka   |               | <b>60</b> | <b>98.70</b> | 3115 | 19  | 22 | 3070 | 45 |
| Flye           | Medaka   |               | <b>60</b> | <b>98.70</b> | 3115 | 21  | 20 | 3069 | 46 |
| Shasta         | Medaka   |               | <b>64</b> | <b>97.66</b> | 3082 | 32  | 42 | 3035 | 47 |
| wtdbg2         | Medaka   |               | <b>63</b> | <b>98.42</b> | 3106 | 24  | 26 | 3064 | 42 |
| Canu (contigs) | Racon    |               | <b>83</b> | <b>93.44</b> | 2949 | 109 | 98 | 2912 | 37 |
| Canu (unitigs) | Racon    |               | <b>71</b> | <b>93.60</b> | 2954 | 108 | 94 | 2918 | 36 |
| Flye           | Racon    |               | <b>85</b> | <b>93.22</b> | 2942 | 115 | 99 | 2907 | 35 |
| Shasta         | Racon    |               | <b>69</b> | <b>93.63</b> | 2955 | 104 | 97 | 2914 | 41 |
| wtdbg2         | Racon    |               | <b>84</b> | <b>93.38</b> | 2947 | 110 | 99 | 2910 | 37 |
| Canu (contigs) | Racon X2 | Pilon + POLCA | <b>10</b> | <b>99.49</b> | 3140 | 5   | 11 | 3095 | 45 |
| Canu (unitigs) | Racon X2 | Pilon + POLCA | <b>10</b> | <b>99.49</b> | 3140 | 5   | 11 | 3095 | 45 |
| Flye           | Racon X2 | Pilon + POLCA | <b>10</b> | <b>99.49</b> | 3140 | 6   | 10 | 3096 | 44 |
| Shasta         | Racon X2 | Pilon + POLCA | <b>4</b>  | <b>99.52</b> | 3141 | 5   | 10 | 3093 | 48 |
| wtdbg2         | Racon X2 | Pilon + POLCA | <b>25</b> | <b>99.46</b> | 3139 | 5   | 12 | 3097 | 42 |
| Canu (contigs) | Racon X2 | Pilon-bt2     | <b>52</b> | <b>99.33</b> | 3135 | 10  | 11 | 3090 | 45 |
| Canu (unitigs) | Racon X2 | Pilon-bt2     | <b>52</b> | <b>99.33</b> | 3135 | 10  | 11 | 3090 | 45 |
| Flye           | Racon X2 | Pilon-bt2     | <b>49</b> | <b>99.37</b> | 3136 | 10  | 10 | 3092 | 44 |
| Shasta         | Racon X2 | Pilon-bt2     | <b>49</b> | <b>99.37</b> | 3136 | 9   | 11 | 3089 | 47 |
| wtdbg2         | Racon X2 | Pilon-bt2     | <b>54</b> | <b>99.30</b> | 3134 | 8   | 14 | 3092 | 42 |
| Canu (contigs) | Racon X2 | Pilon-BWA     | <b>58</b> | <b>99.14</b> | 3129 | 12  | 15 | 3086 | 43 |
| Canu (unitigs) | Racon X2 | Pilon-BWA     | <b>57</b> | <b>99.18</b> | 3130 | 12  | 14 | 3086 | 44 |
| Flye           | Racon X2 | Pilon-BWA     | <b>55</b> | <b>99.24</b> | 3132 | 12  | 12 | 3089 | 43 |
| Shasta         | Racon X2 | Pilon-BWA     | <b>56</b> | <b>99.21</b> | 3131 | 12  | 13 | 3085 | 46 |

|                |          |           |           |              |      |     |     |      |    |
|----------------|----------|-----------|-----------|--------------|------|-----|-----|------|----|
| wtdbg2         | Racon X2 | Pilon-BWA | <b>59</b> | <b>99.11</b> | 3128 | 11  | 17  | 3087 | 41 |
| Canu (contigs) | Racon X2 | POLCA     | <b>4</b>  | <b>99.52</b> | 3141 | 5   | 10  | 3097 | 44 |
| Canu (unitigs) | Racon X2 | POLCA     | <b>25</b> | <b>99.46</b> | 3139 | 5   | 12  | 3095 | 44 |
| Flye           | Racon X2 | POLCA     | <b>10</b> | <b>99.49</b> | 3140 | 6   | 10  | 3096 | 44 |
| Shasta         | Racon X2 | POLCA     | <b>4</b>  | <b>99.52</b> | 3141 | 5   | 10  | 3092 | 49 |
| wtdbg2         | Racon X2 | POLCA     | <b>46</b> | <b>99.40</b> | 3137 | 5   | 14  | 3095 | 42 |
| Canu (contigs) | Racon X2 | POLCA X2  | <b>10</b> | <b>99.49</b> | 3140 | 5   | 11  | 3096 | 44 |
| Canu (unitigs) | Racon X2 | POLCA X2  | <b>25</b> | <b>99.46</b> | 3139 | 5   | 12  | 3095 | 44 |
| Flye           | Racon X2 | POLCA X2  | <b>1</b>  | <b>99.56</b> | 3142 | 6   | 8   | 3098 | 44 |
| Shasta         | Racon X2 | POLCA X2  | <b>4</b>  | <b>99.52</b> | 3141 | 5   | 10  | 3092 | 49 |
| wtdbg2         | Racon X2 | POLCA X2  | <b>39</b> | <b>99.43</b> | 3138 | 5   | 13  | 3095 | 43 |
| Canu (contigs) | Racon X2 |           | <b>68</b> | <b>93.66</b> | 2956 | 103 | 97  | 2916 | 40 |
| Canu (unitigs) | Racon X2 |           | <b>78</b> | <b>93.50</b> | 2951 | 111 | 94  | 2912 | 39 |
| Flye           | Racon X2 |           | <b>71</b> | <b>93.60</b> | 2954 | 113 | 89  | 2920 | 34 |
| Shasta         | Racon X2 |           | <b>71</b> | <b>93.60</b> | 2954 | 100 | 102 | 2913 | 41 |
| wtdbg2         | Racon X2 |           | <b>75</b> | <b>93.57</b> | 2953 | 106 | 97  | 2919 | 34 |
| Canu (contigs) | Racon X3 |           | <b>71</b> | <b>93.60</b> | 2954 | 105 | 97  | 2914 | 40 |
| Canu (unitigs) | Racon X3 |           | <b>66</b> | <b>93.76</b> | 2959 | 108 | 89  | 2922 | 37 |
| Flye           | Racon X3 |           | <b>78</b> | <b>93.50</b> | 2951 | 118 | 87  | 2916 | 35 |
| Shasta         | Racon X3 |           | <b>67</b> | <b>93.73</b> | 2958 | 102 | 96  | 2915 | 43 |
| wtdbg2         | Racon X3 |           | <b>78</b> | <b>93.50</b> | 2951 | 109 | 96  | 2918 | 33 |
| Canu (contigs) | Racon X4 |           | <b>78</b> | <b>93.50</b> | 2951 | 113 | 92  | 2915 | 36 |
| Canu (unitigs) | Racon X4 |           | <b>82</b> | <b>93.47</b> | 2950 | 110 | 96  | 2912 | 38 |
| Flye           | Racon X4 |           | <b>69</b> | <b>93.63</b> | 2955 | 108 | 93  | 2921 | 34 |
| Shasta         | Racon X4 |           | <b>75</b> | <b>93.57</b> | 2953 | 108 | 95  | 2910 | 43 |
| wtdbg2         | Racon X4 |           | <b>75</b> | <b>93.57</b> | 2953 | 110 | 93  | 2918 | 35 |
| Canu (contigs) |          | POLCA X2  | <b>10</b> | <b>99.49</b> | 3140 | 5   | 11  | 3097 | 43 |

|                |  |          |           |              |      |     |     |      |    |
|----------------|--|----------|-----------|--------------|------|-----|-----|------|----|
| Canu (unitigs) |  | POLCA X2 | <b>25</b> | <b>99.46</b> | 3139 | 5   | 12  | 3096 | 43 |
| Flye           |  | POLCA X2 | <b>10</b> | <b>99.49</b> | 3140 | 6   | 10  | 3095 | 45 |
| MaSuRCa-CA     |  | POLCA X2 | <b>1</b>  | <b>99.56</b> | 3142 | 5   | 9   | 3083 | 59 |
| MaSuRCa-Flye   |  | POLCA X2 | <b>25</b> | <b>99.46</b> | 3139 | 6   | 11  | 3095 | 44 |
| Shasta         |  | POLCA X2 | <b>49</b> | <b>99.37</b> | 3136 | 9   | 11  | 3090 | 46 |
| wtdbg2         |  | POLCA X2 | <b>46</b> | <b>99.40</b> | 3137 | 6   | 13  | 3094 | 43 |
| Canu (contigs) |  |          | <b>88</b> | <b>88.66</b> | 2798 | 201 | 157 | 2764 | 34 |
| Canu (unitigs) |  |          | <b>87</b> | <b>88.69</b> | 2799 | 201 | 156 | 2765 | 34 |
| Flye           |  |          | <b>65</b> | <b>93.92</b> | 2964 | 98  | 94  | 2927 | 37 |
| MaSuRCa-CA     |  |          | <b>1</b>  | <b>99.56</b> | 3142 | 5   | 9   | 3083 | 59 |
| MaSuRCa-Flye   |  |          | <b>10</b> | <b>99.49</b> | 3140 | 6   | 10  | 3096 | 44 |
| Shasta         |  |          | <b>86</b> | <b>91.10</b> | 2875 | 152 | 129 | 2839 | 36 |
| wtdbg2         |  |          | <b>89</b> | <b>80.26</b> | 2533 | 327 | 296 | 2505 | 28 |

*Note:* Rank – place in the overall ranking according to the number of complete (single-copy + duplicated) BUSCOs; ONT – Oxford Nanopore Technologies; bt2 – bowtie2; X2, X3, X4 – number of iterations; MaSuRCA-CA – MaSuRCA coupled with Celera Assembler; MaSuRCA-Flye – MaSuRCA coupled with Flye. Green – the best results, red – the worst results, yellow – average results.
