# Supplementary material for: High-Quality Genome Assembly of Fusarium oxysporum f. sp. lini
Source: PubMed Central journal article supplement (PMC7481384; doi:10.3389/fgene.2020.00959), 2020-08-27
Supplement: Data_Sheet_6.pdf [file Data_Sheet_6.pdf]

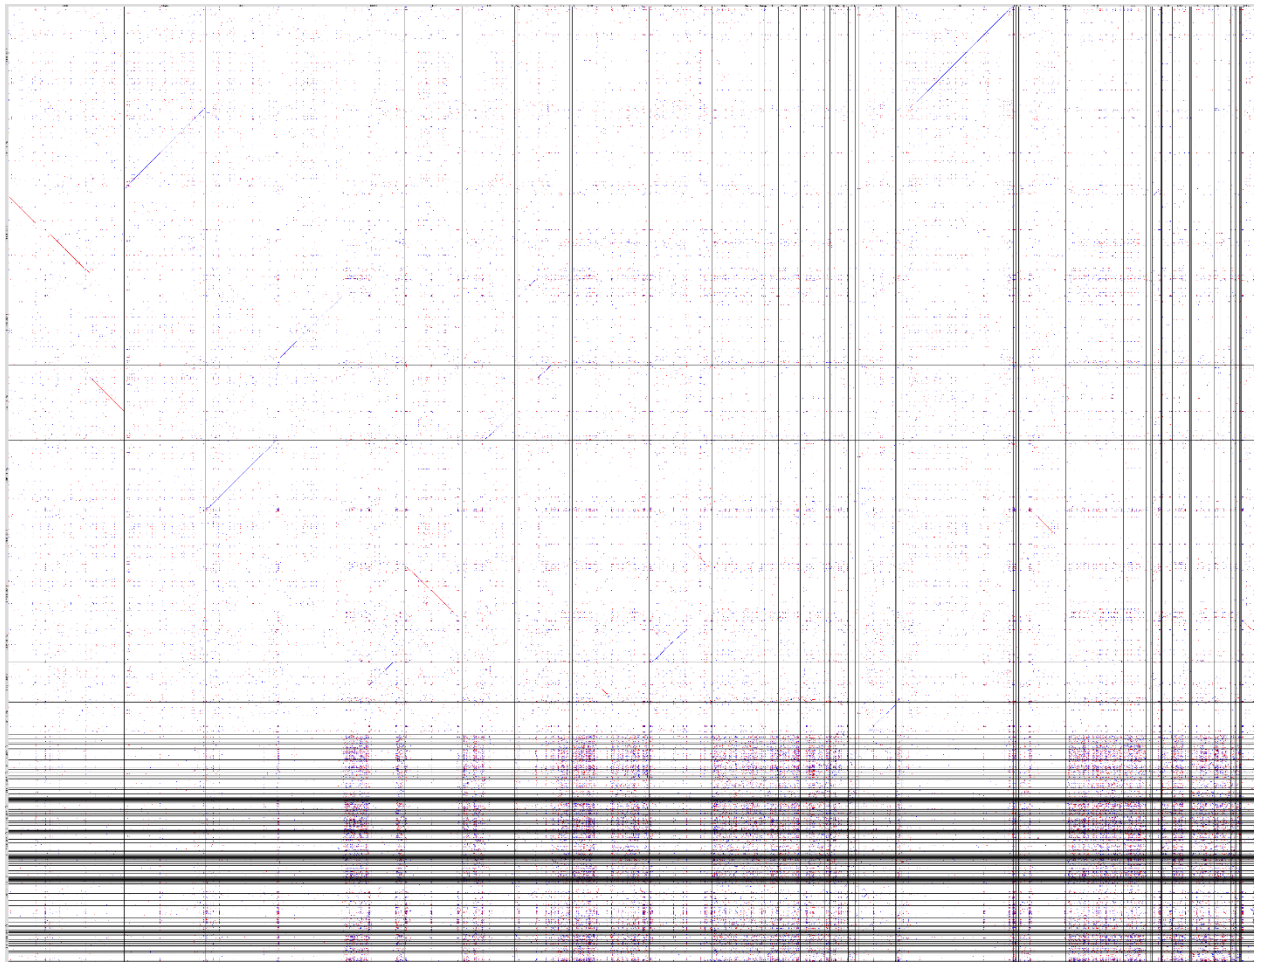

**Supplementary Data 6.** Dotplot illustrating homology between the current *F. oxysporum* f. sp. *lini* assembly (before filtering redundant contigs with the Purge Haplotigs tool) and GCA\_003315725.1 / ASM331572v1 deposited in the NCBI Genome database (vertical axis).
