# Supplementary material for: High-Quality Genome Assembly of Fusarium oxysporum f. sp. lini
Source: PubMed Central journal article supplement (PMC7481384; doi:10.3389/fgene.2020.00959), 2020-08-27
Supplement: Data_Sheet_7.pdf [file Data_Sheet_7.pdf]

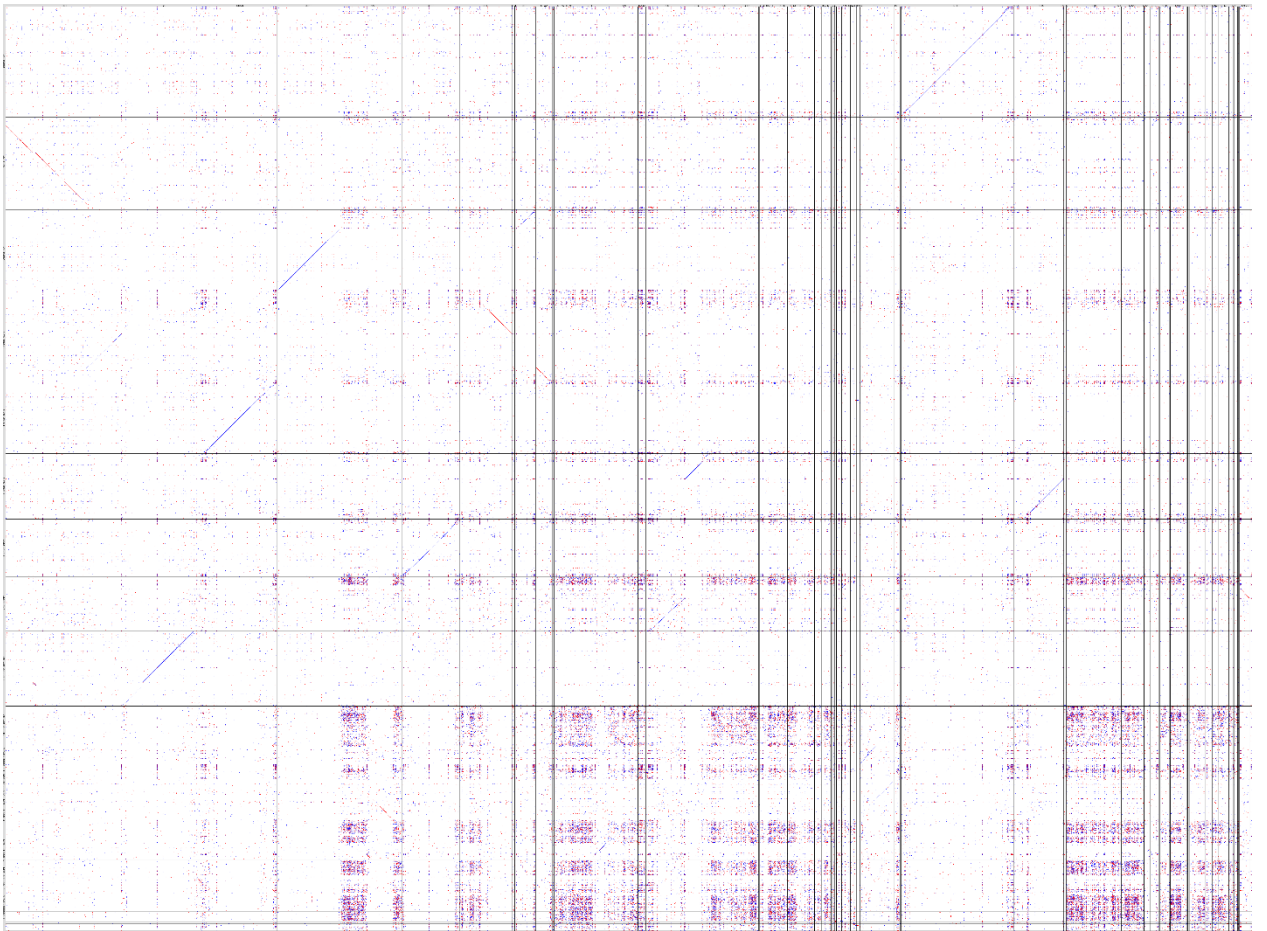

**Supplementary Data 7.** Dotplot illustrating homology between the current *F. oxysporum* f. sp. *lini* assembly (before filtering redundant contigs with the Purge Haplotigs tool) and GCA\_003615085.1 / FoC\_Fus2\_v1 deposited in the NCBI Genome database (vertical axis).
