# Supplementary material for: High-Quality Genome Assembly of Fusarium oxysporum f. sp. lini
Source: PubMed Central journal article supplement (PMC7481384; doi:10.3389/fgene.2020.00959), 2020-08-27
Supplement: Data_Sheet_10.pdf [file Data_Sheet_10.pdf]

**Supplementary Data 10.** Annotation statistics for gene models.

|                     | <b>Annotated<br/>gene models</b> | <b>Total annotation<br/>entries added</b> |
|---------------------|----------------------------------|-------------------------------------------|
| Pfam                | 11841                            | 19718                                     |
| Secretome           | 1744                             | 1744                                      |
| MEROPS              | 539                              | 539                                       |
| eggNOG              | 12423                            | 12423                                     |
| CAZyme              | 732                              | 1357                                      |
| BUSCO               | 1334                             | 1334                                      |
| antiSMASH           | 205                              | 266                                       |
| Assigned gene names | 1032                             | 1032                                      |
